# Supplementary material for: RAC1B Suppresses TGF-β-Dependent Chemokinesis and Growth Inhibition through an Autoregulatory Feed-Forward Loop Involving PAR2 and ALK5
Source: Cancers (Basel). 2019 Aug 20;11(8):1211. doi: 10.3390/cancers11081211 (PMC6721813; doi:10.3390/cancers11081211)

Supplementary Figure S1

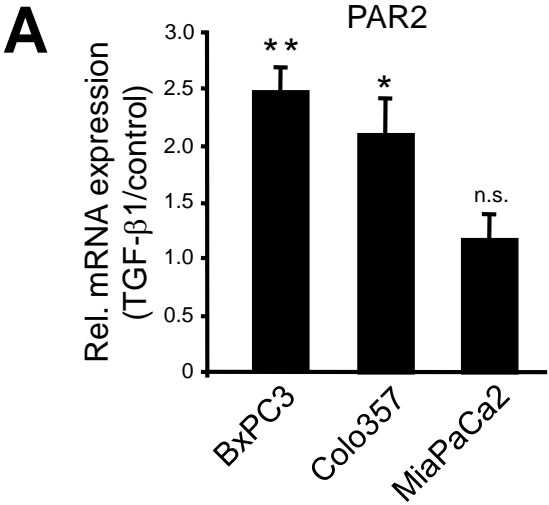

**Figure S1A.** Effect of TGF-β1 on PAR2 expression in various PDAC-derived cell lines. The indicated PDAC-derived cell lines were stimulated with TGF-β1 for 24 h and subsequently subjected to qPCR analysis of PAR2 and TBP. Data represent the normalized mean ± SD of three assays. The asterisk indicate significance compared to untreated controls.

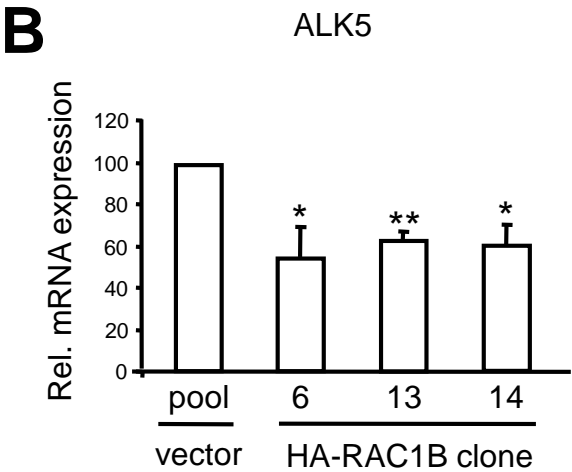

**Figure S1B.** Effect of stable ectopic RAC1B overexpression on ALK5 mRNA expression. Three individual clones of Panc1 cells with stable ectopic expression of HA-tagged RAC1B (HA-RAC1B) or empty vector (vector) were subjected to qPCR analysis of ALK5. Data represent the normalized mean ± SD of three parallel wells from one representative experiment out of three experiments performed in total. The asterisk indicate significance compared to the vector control.

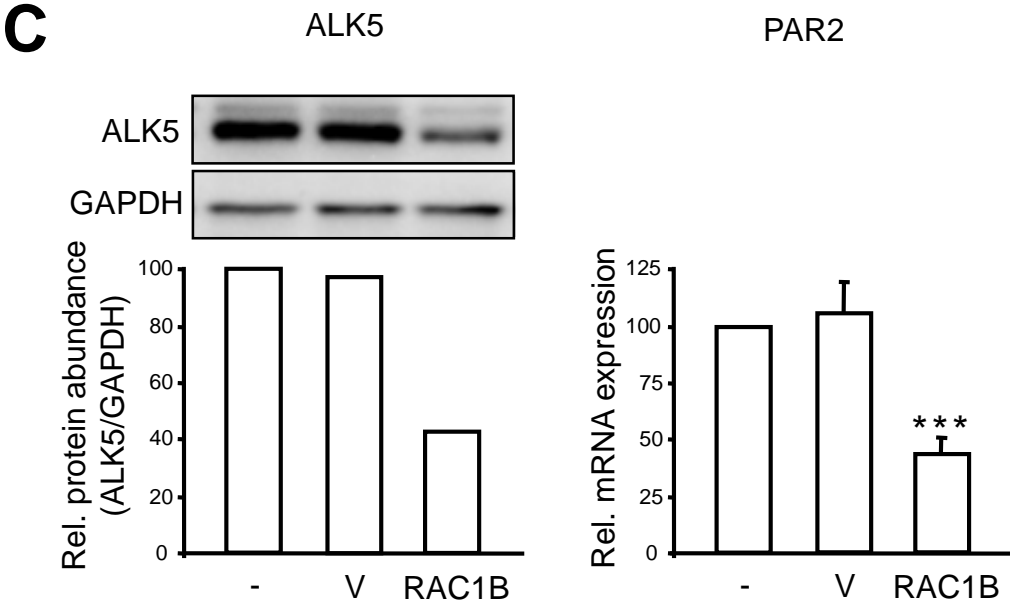

**Figure S1C.** Effect of transient transfection of HA-RAC1B into Panc1-RAC1B-KO cells on ALK5 protein expression and PAR2 mRNA expression. Left-hand graph, Panc1 cells mock-transfected (-), or transfected with either empty plasmid vector (V) or the same vector encoding HA-tagged RAC1B (RAC1B) were lysed 48 h after the start of transfection and subjected to immunoblot analysis of ALK5. Right-hand graph, The same as in the left graph, except that cells were subjected to RNA isolation and qPCR analysis of PAR2. Data shown are the means ± SD of three wells processed in parallel. In both graphs one of two assays is shown both with very similar results. The asterisk indicate significance compared to mock-transfected controls.

## Supplementary Figure S2

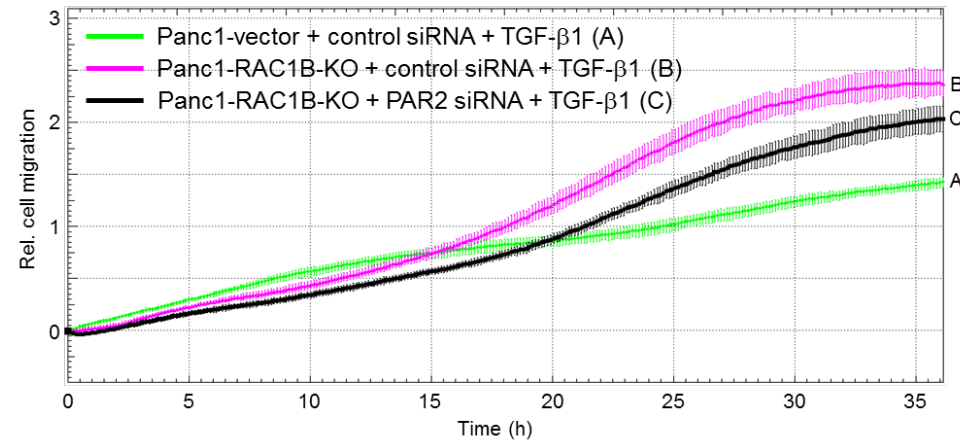

**Figure S2.** Effect of PAR2 knockdown on TGF- $\beta$ 1-induced chemokinesis in Panc1-RAC1B-KO cells. Panc1-RAC1B-KO and vector control cells were transfected twice with 50 nM of either control or PAR2 siRNA and 48 h later assayed for migratory activity on an xCELLigence platform in the presence of TGF- $\beta$ 1. The graph shows a representative experiment. Data are the mean  $\pm$  SD from 3-4 wells per condition. Differences between Panc1-RAC1B-KO + PAR2 siRNA + TGF- $\beta$ 1 (black curve, tracing C) and Panc1-RAC1B-KO + control siRNA + TGF- $\beta$ 1 (magenta curve, tracing B) are significant at 16:30 and all later time points. Successful inhibition of RAC1B and PAR2 was verified by immunoblotting and qPCR analysis, respectively (not shown).

## Supplementary Figure S3

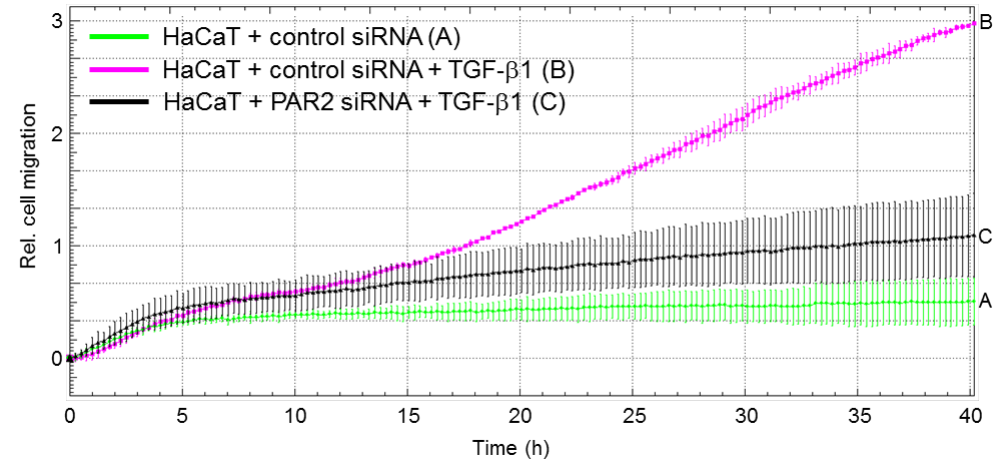

**Figure S3.** Effect of PAR2 knockdown on TGF- $\beta$ 1-induced chemokinesis in HaCaT cells. HaCaT cells were transfected twice with 50 nM of either control or PAR2 siRNA and 48 h later assayed for chemokinetic activity by RTCA technology in the absence or presence of TGF- $\beta$ 1. The graph shows a representative experiment. Data are the mean  $\pm$  SD from 3-4 wells per condition. Differences between HaCaT cells + PAR2 siRNA + TGF- $\beta$ 1 (black curve, tracing C) and HaCaT cells + control siRNA + TGF- $\beta$ 1 (magenta curve, tracing B) are significant for the first time at 17:00 and all later time points. Successful inhibition of PAR2 was verified by qPCR analysis (data not shown).

## Supplementary Figure S4

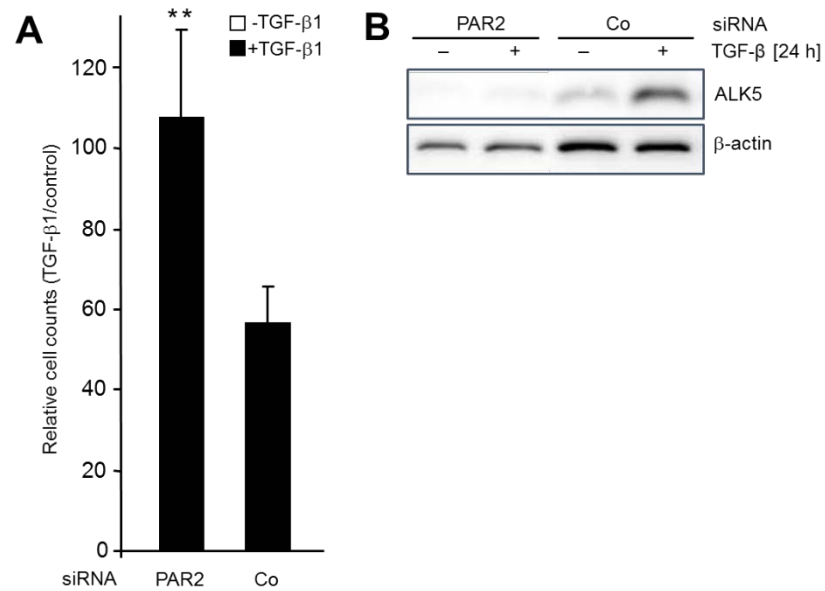

**Figure S4.** Effect of PAR2 knockdown on the growth-inhibitory effect of TGF-β1 in HaCaT cells. **(A)** HaCaT cells were transfected twice with 50 nM of either PAR2 siRNA or control (Co) siRNA. Forty-eight hours after the second round of transfection cells were treated, or not, with TGF-β1 for 24 h, then detached and counted. Data are the mean  $\pm$  SD of three experiments and are displayed as % reduction in cell numbers of TGF-β1-treated cells relative to numbers of untreated control cells. The asterisks indicate significant difference. **(B)** As in **(A)** except that cells were lysed after TGF-β1 treatment and processed for immunoblotting of ALK5, and β-actin as a loading control.

Supplementary Material: Full blots and band quantification: Figure 1C and Supplementary Figure S1C

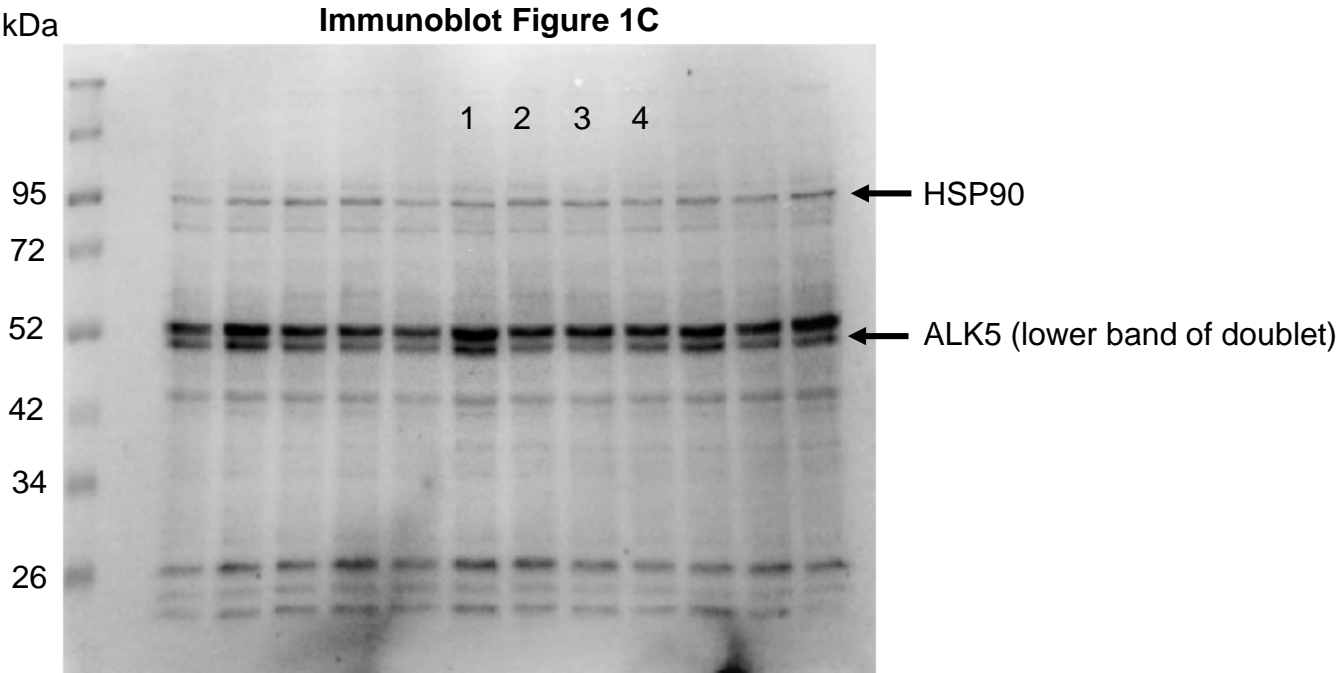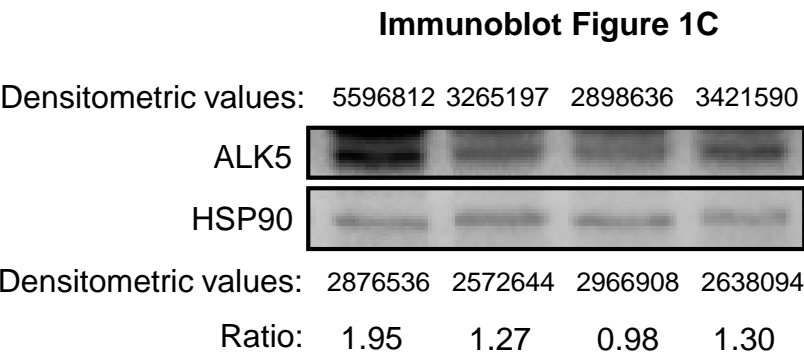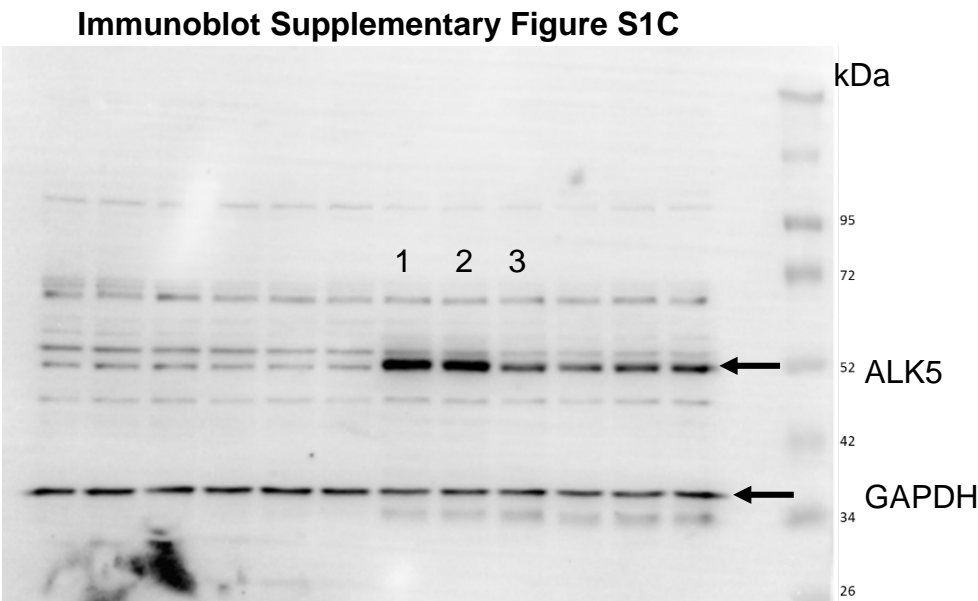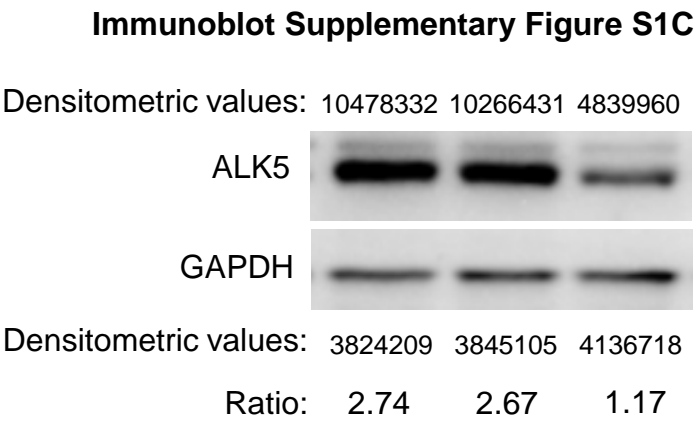

Supplementary Material: Full blots and band quantification: Figure 2B

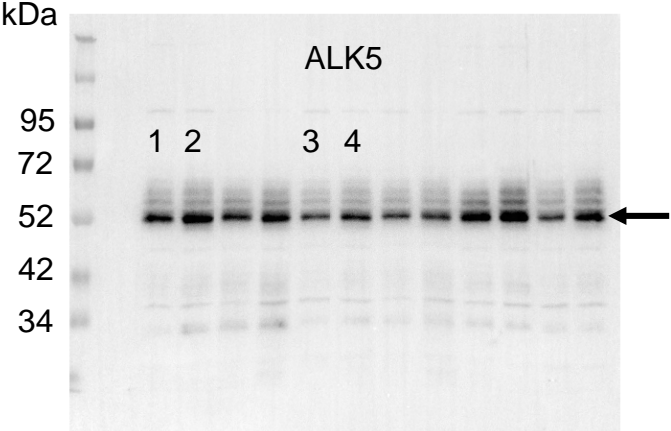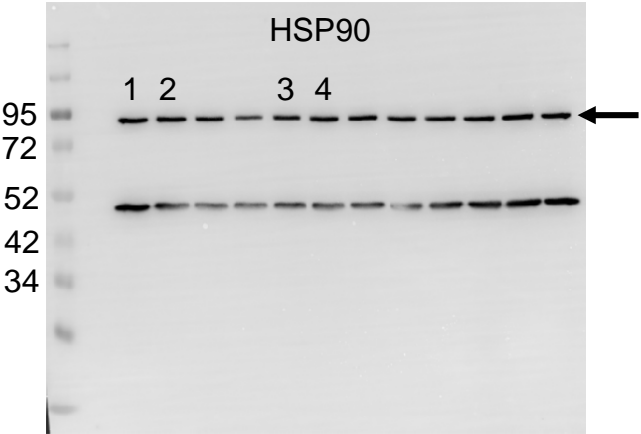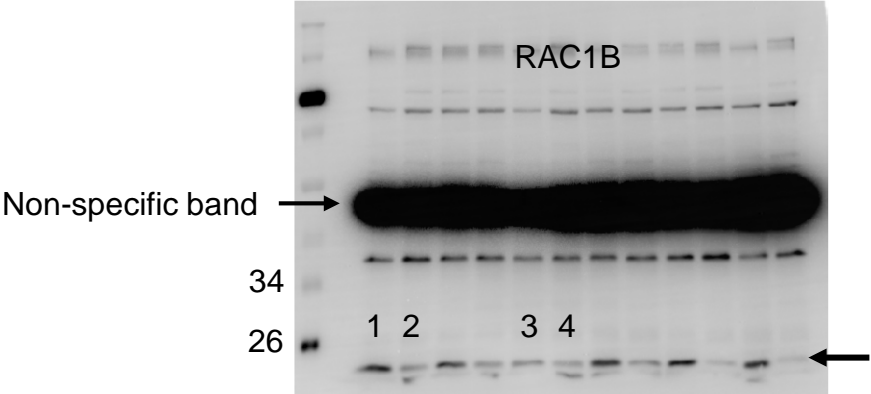

Densitometric values: 12495096 22699619 5982178 10328432

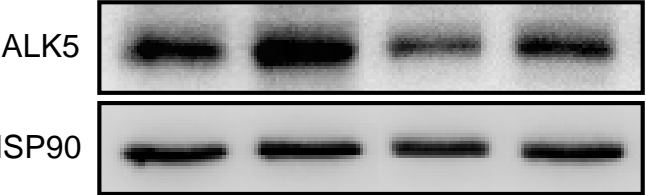

Densitometric values: 14112878 12541226 13610119 13014488

Ratio: 0.89 1.81 0.44 0.80

# Supplementary Material: Full blots and band quantification: Figure 2E

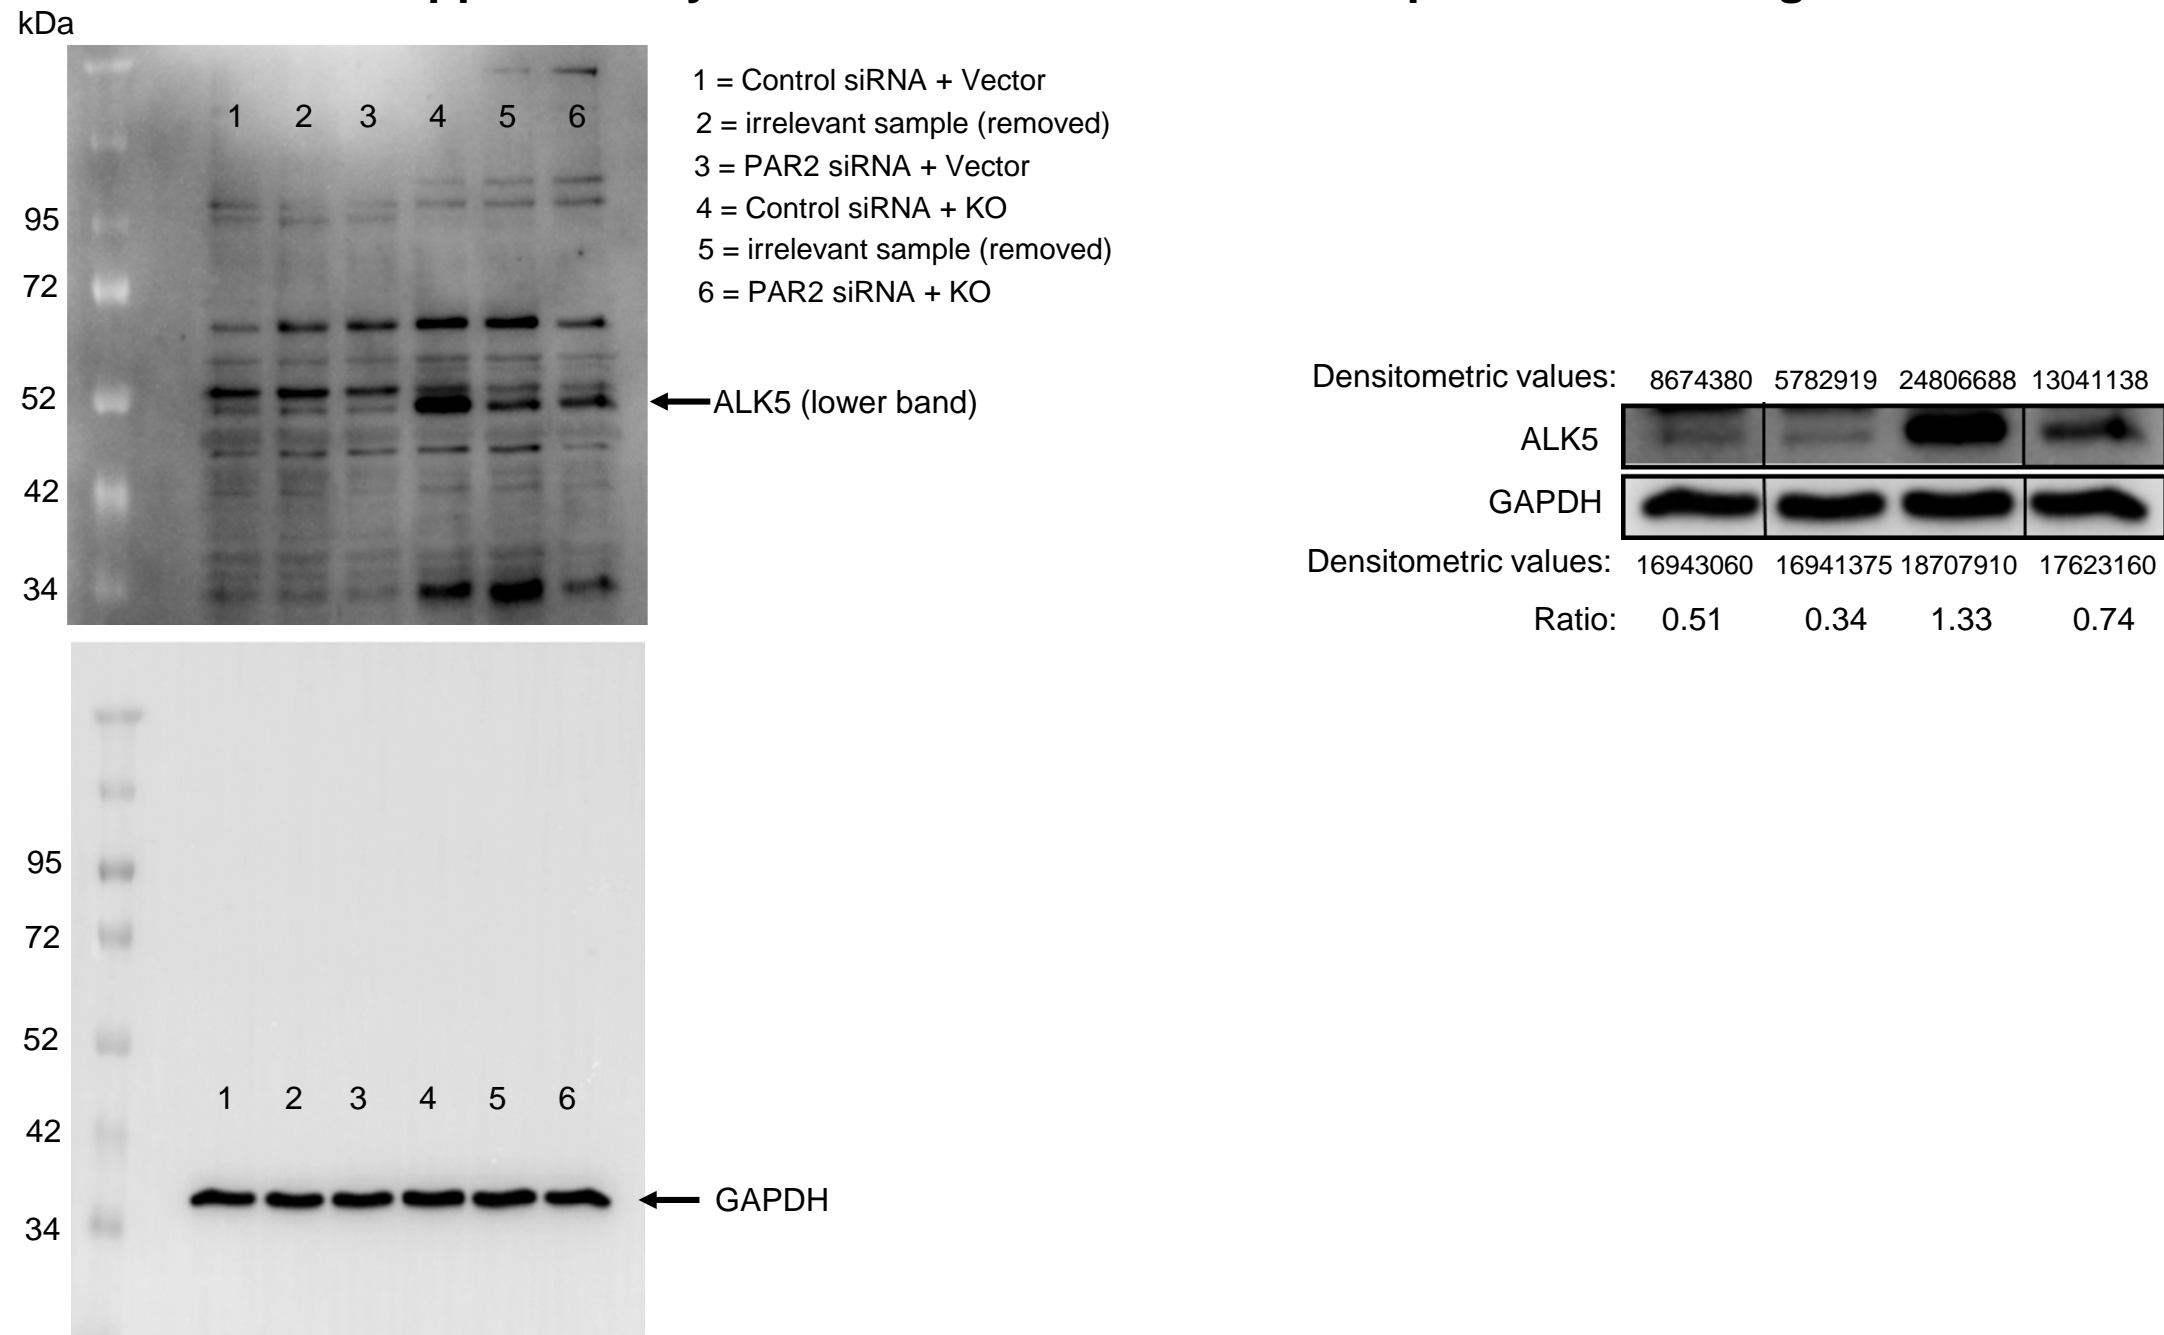

## Supplementary Material: Full blots and band quantification: Figure 4B

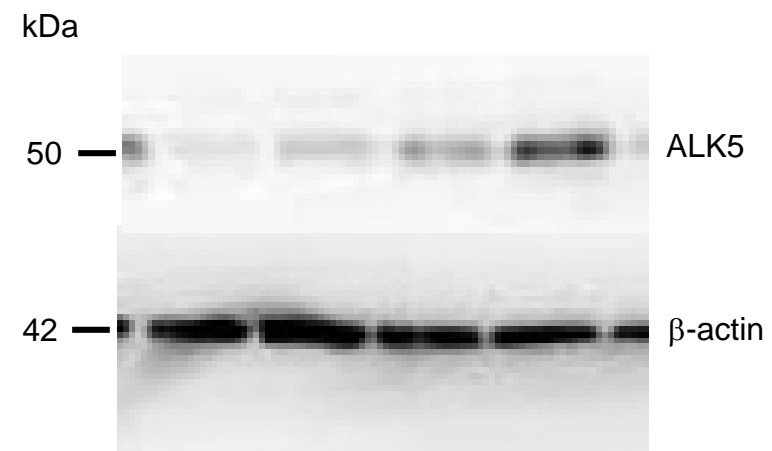

Supplement: Supplementary file 1 [file cancers-11-01211-s001.pdf]
